# Supplementary material for: Evaluation of airborne particulates and associated metals originating from steel slag applied to rural unpaved roads
Source: Royal Society of Chemistry journal article supplement (doi:10.1039/d2ea00040g), 2022-12-15
Supplement: d2ea00040g1.pdf [file d2ea00040g1.pdf]

## Supplemental Information

### **Evaluation of Airborne Particulates and Associated Metals Originating from Steel Slag Applied to Rural Unpaved Roads**

James Kacer<sup>1</sup>, Ralph Altmaier<sup>1</sup>, Drew Latta<sup>2</sup>, Patrick T. O'Shaughnessy<sup>1</sup>, David M. Cwiertny<sup>2,3</sup>

<sup>1</sup> Department of Occupational and Environmental Health, College of Public Health, University of Iowa

<sup>2</sup> Department of Civil and Environmental Engineering, College of Engineering, University of Iowa

<sup>3</sup> Director, Center for Health Effects of Environmental Contamination, W195 Chemistry Building, University of Iowa, Iowa City, Iowa, 52242

## Filter Sample Analysis for Metals

Prior to analysis by ICP-MS, filter samples were dissolved by microwave-assisted digestion following EPA Method 3051A [1] using an Ethos UP microwave with SK-15 rotor (Milestone, Inc., Via Fatebenefratelli 1/5 - 24010 Sorisole (BG) - Italy). Samples were immersed in 9 mL of concentrated trace-metals grade nitric acid (67%, Fisher Scientific) and 3 mL of trace metals grade hydrochloric acid (37%, Fisher Scientific) and sealed inside PTFE digestion vessels. The microwave temperature program followed the Milestone, Inc. supplied program for EPA 3051A on the Ethos UP. Microwave temperature was ramped linearly to 150 °C over ten minutes, followed by a second ramp to 180 °C over ten minutes, and was held isothermally at 180 °C for the remaining ten minutes. Total digestion time was 30 minutes. Finally, the samples were naturally cooled to room temperature prior to opening. After digestion samples were diluted to 50 mL with 18.2 MΩ deionized water. An aliquot of sample was filtered through a nylon filter (0.22 μm) and diluted again with deionized water (2 mL sample and 8 mL water). Each run contained at least one method blank consisting of acid in an empty digestion vessel carried through an identical procedure. Metals in the digested filter sample were analyzed on an Agilent 7900 ICP-MS using He collision cell mode to remove polyatomic interferences. ICP-MS and digestion performance was assessed using metals-spiked blanks carried through the digestion procedure and RM-8704, Buffalo River Sediment (U.S. National Institute of Standards and Technology). Spike recoveries were greater than 85% for all reported metals. Metal recoveries for the Buffalo River Sediment were 86% for manganese. Performance within a run was monitored using periodic analyses of a trace metals in drinking water standard diluted into the same matrix as samples (TMDW-A, High Purity Standards, Inc.). Repeatability was assessed by re-analysis of a duplicate sample every 15 samples. Element concentrations from ICP-MS were used to calculate μg of metal per filter and mg/kg of each element by using the gravimetric mass of material on each filter.

## Tables

**Table S1.** Site locations, estimated traffic flows at each site, and instrumentation deployed. All counties in Iowa.

| Site Name  | Location/Slag Application Status                              | Traffic Flow <sup>1</sup> , vehicles per day | Instruments Deployed                                                                                                                      |
|------------|---------------------------------------------------------------|----------------------------------------------|-------------------------------------------------------------------------------------------------------------------------------------------|
| Background | 920 220 <sup>th</sup> Street, Scott County, no slag applied   | 45                                           | Dichotomous sampler                                                                                                                       |
| Site A     | 3445 120 <sup>th</sup> Street, Muscatine County, slag applied | 100                                          | Dichotomous sampler, ambient continuous metals monitor, beta attenuation monitor, meteorological station (all placed in a sample trailer) |
| Site B     | 1689 130 <sup>th</sup> Street, Muscatine County, slag applied | 100                                          | Dichotomous sampler                                                                                                                       |

<sup>1</sup>Traffic flow data were obtained from the Iowa Department of Transportation [2, 3]

**Table S2A.** Metals concentrations (mg/kg dust dry weight) from slag road dust samples taken at study sample site locations.

| Sample     | Background Site | Slag Site A | Slag Site B |
|------------|-----------------|-------------|-------------|
| Aluminum   | 3400            | 2200        | 7200        |
| Antimony   | 32.7            | 82.5        | 55.1        |
| Arsenic    | 1.1             | 5.4         | 6.2         |
| Barium     | NA              | NA          | NA          |
| Beryllium  | NA              | NA          | NA          |
| Cadmium    | 5.7             | 33.3        | 82.7        |
| Chromium   | 5.6             | 172.4       | 297.9       |
| Cobalt     | 1.5             | 1.0         | 1.8         |
| Copper     | 11.8            | 113.5       | 21.2        |
| Iron       | 4390            | 9530        | 18120       |
| Lead       | 0.0             | 0.1         | 0.2         |
| Lithium    | NA              | NA          | NA          |
| Manganese  | 254.7           | 1391.5      | 2472        |
| Mercury    | NA              | NA          | NA          |
| Molybdenum | NA              | NA          | NA          |
| Nickel     | 2.7             | 2.7         | 9.4         |
| Selenium   | NA              | NA          | NA          |
| Silver     | NA              | NA          | NA          |
| Strontium  | NA              | NA          | NA          |
| Thallium   | NA              | NA          | NA          |
| Tin        | NA              | NA          | NA          |
| Vanadium   | 8.0             | 19.7        | 34.1        |
| Zinc       | 20.1            | 55.1        | 106.6       |

NA = not analyzed

**Table S2B.** Metals concentrations (mg/kg dust dry weight) from slag road dust samples taken at Iowa county roads\* near study sample sites.

| Sample     | No Slag Road | Slag Road 1 | Slag Road 2 | Slag Road 3 | Slag Road 4 | Slag Road 5 | Slag Road 6 |
|------------|--------------|-------------|-------------|-------------|-------------|-------------|-------------|
| Aluminum   | 1,800        | 1,450       | 10,400      | 20,000      | 22,000      | 12,700      | 10,000      |
| Antimony   | ND           | ND          | ND          | ND          | ND          | ND          | ND          |
| Arsenic    | 1.24         | 2.55        | 3.03        | 2.34        | 2.98        | 4.76        | 1.84        |
| Barium     | 21.4         | 29.5        | 99.4        | 62.2        | 91.4        | 108         | 39.9        |
| Beryllium  | ND           | ND          | ND          | ND          | ND          | ND          | ND          |
| Cadmium    | ND           | ND          | ND          | ND          | ND          | ND          | ND          |
| Chromium   | 3.59         | 44          | 329         | 316         | 444         | 148         | 162         |
| Cobalt     | 1.2          | 1.89        | 3.75        | 2.07        | 2.96        | 3.92        | 1.56        |
| Copper     | 2.39         | 10.3        | 22.1        | 38          | 50.7        | 26.4        | 17.5        |
| Iron       | 3,859.30     | 7,537.54    | 29,175.05   | 30,700      | 39,600      | 16,900      | 19,100      |
| Lead       | 6.11         | 9.98        | 10.1        | 29          | 30.5        | 27.2        | 15.2        |
| Lithium    | ND           | ND          | ND          | ND          | ND          | ND          | ND          |
| Manganese  | 251          | 1,400       | 4,920       | 3,770       | 5,350       | 1,850       | 2,410       |
| Mercury    | ND           | ND          | ND          | ND          | ND          | ND          | ND          |
| Molybdenum | ND           | 1.2         | 4.7         | 5.7         | 8.4         | 3.3         | 3           |
| Nickel     | 3.08         | 7.27        | 13.1        | 16.5        | 30.9        | 15.4        | 10.5        |
| Selenium   | ND           | ND          | ND          | 1           | ND          | ND          | ND          |
| Silver     | ND           | ND          | ND          | 1.39        | 1.53        | 0.91        | 0.93        |
| Strontium  | 66.9         | 120         | 158         | 92.2        | 117         | 80.8        | 90.2        |
| Thallium   | ND           | ND          | ND          | ND          | ND          | ND          | ND          |
| Tin        | ND           | ND          | ND          | 8.8         | 7.2         | ND          | 5.5         |
| Vanadium   | 5.47         | 10.3        | 73.5        | 64.8        | 97.7        | 40.4        | 36.2        |
| Zinc       | 15.6         | 57.1        | 125         | 370         | 533         | 244         | 191         |

ND = not detected

\*No Slag Road = 210th St. + 1st Avenue, Scott County

Slag Road 1 = Yellow Avenue, Muscatine County

Slag Road 2 = 3727 120th St., Muscatine County

Slag Road 3 = 1072 260th St., Muscatine County

Slag Road 4 = 2051 Davis Ave., Muscatine County

Slag Road 5 = 2075 Trolley Ave., Muscatine County

Slag Road 6 = 2670 Independence Ave., Muscatine County

**Table S3.** Sieve Analysis of Crushed Limestone and Slag Applied to the Roads (Typical)

| Sieve | Crushed Limestone<br>% passing | Slag Batch 1<br>% passing | Slag Batch 2<br>% passing | Class A Specification<br>% passing |
|-------|--------------------------------|---------------------------|---------------------------|------------------------------------|
| 1"    | 100                            | 100                       | 100                       | 100                                |
| 3/4"  | 92                             | 97.2                      | 97                        | 95-100                             |
| 1/2"  | 81.8                           | 81                        | 66                        | 70-90                              |
| 3/8"  | 72.6                           | 72.5                      | 52                        |                                    |
| 4     | 54.8                           | 50                        | 34                        | 30-55                              |
| 8     | 41.3                           | 33.9                      | 24                        | 15-40                              |
| 16    | 32.5                           | 22.5                      |                           |                                    |
| 30    | 26.9                           | 14.4                      | 14                        |                                    |
| 50    | 23.3                           | 9                         | 11                        |                                    |
| 100   | 19.2                           | 5.5                       |                           |                                    |
| 200   | 15.3                           | 3.4                       | 6.1                       | 6-16                               |

Results provided by the Muscatine County Engineer [4]

**Table S4.** Summary of XRD results for bulk samples collected from the road surface

|                                                  | % Calcite | % Dolomite | % Quartz |
|--------------------------------------------------|-----------|------------|----------|
| No slag road (Scott County)                      | 3         | 90.5       | 6.5      |
| Background site (Scott County)                   | 2.5       | 93.1       | 4.4      |
| Slag sites (eight locations in Muscatine County) |           |            |          |
| Mean                                             | 41.9      | 50.5       | 7.5      |
| Minimum                                          | 24.3      | 21         | 2.4      |
| Maximum                                          | 68        | 73.3       | 21       |
| Std Dev                                          | 16.5      | 21.4       | 6.2      |

**Table S5.** Comparison of metals concentrations in PM at Site A as analyzed by the ACMM and by ICP-MS

| Metal                | ACMM, Average Concentration, ng/m <sup>3</sup> , n = 709 (SD) | ACMM Detection Limit <sup>1</sup> , ng/m <sup>3</sup> | ACMM, Relative Abundance | ICP, Average Concentration, ng/m <sup>3</sup> , n = 12 (SD) | t- test p values |
|----------------------|---------------------------------------------------------------|-------------------------------------------------------|--------------------------|-------------------------------------------------------------|------------------|
| Calcium              | 19000 (33000)                                                 | 0.30                                                  | 67%                      | 30236 (22015)                                               | 0.24             |
| Aluminum             | 2600 (4400)                                                   | 100                                                   | 9.2%                     | 1886 (621)                                                  | 0.57             |
| Silicon              | 2300 (3300)                                                   | 17.8                                                  | 7.9%                     | NA                                                          |                  |
| Magnesium            | NA                                                            |                                                       | NA                       | 11198 (725)                                                 |                  |
| Cadmium              | 1800 (9000)                                                   | 2.5                                                   | 6.4%                     | 0.069 (0.036)                                               |                  |
| Niobium <sup>2</sup> | 1100 (1300)                                                   |                                                       | 3.8%                     | NA                                                          |                  |
| Iron                 | 600 (910)                                                     | 0.17                                                  | 2.1%                     | 978 (569)                                                   | 0.15             |
| Sulphur              | 390 (260)                                                     | 3.16                                                  | 1.3%                     | NA                                                          |                  |
| Potassium            | 230 (230)                                                     | 1.17                                                  | 0.80%                    | 316 (195)                                                   | 0.20             |
| Lead                 | 120 (590)                                                     | 0.13                                                  | 0.43%                    | 1.6 (2.5)                                                   | 0.49             |
| Manganese            | 85 (140)                                                      | 0.14                                                  | 0.30%                    | 156 (112)                                                   | 0.081            |
| Titanium             | 47 (66)                                                       |                                                       | 0.16%                    | NA                                                          |                  |
| Chromium             | 36 (140)                                                      | 0.12                                                  | 0.13%                    | 30 (13)                                                     | 0.88             |
| Antimony             | 22 (97)                                                       | 5.2                                                   | 0.075%                   | 0.57 (0.23)                                                 | 0.44             |
| Zinc                 | 15 (23)                                                       | 0.067                                                 | 0.053%                   | 169 (187)                                                   | <0.0001          |
| Phosphorus           | 14 (27)                                                       | 5.2                                                   | 0.047%                   | NA                                                          |                  |
| Strontium            | 12 (21)                                                       |                                                       | 0.041%                   | NA                                                          |                  |
| Chlorine             | 8.3 (55)                                                      | 1.73                                                  | 0.029%                   | NA                                                          |                  |
| Palladium            | 3.7 (14)                                                      |                                                       | 0.013%                   | NA                                                          |                  |
| Tin                  | 3.0 (20)                                                      | 4.1                                                   | 0.011%                   | NA                                                          |                  |
| Zirconium            | 2.9 (5.6)                                                     |                                                       | 0.010%                   | NA                                                          |                  |
| Vanadium             | 2.9 (5.6)                                                     | 0.12                                                  | 0.010%                   | 3.2 (2.7)                                                   | 0.88             |

Metals constituting less than 0.01% relative abundance were not included in this table.

<sup>1</sup>60-minute sampling period, 68% confidence interval [5], DLs not provided for every analyte .

<sup>2</sup>Niobium not analyzed as part of the sample, used for QA/QC only. Not included in Figure S1.

NA = not analyzed

**Table S6.** Comparison of mean (Std. Dev.) Mn concentrations at Site A as analyzed by the ACMM and by ICP-MS for the same 12 sample dates.

| ICP Mn,<br>PM10, ng/m <sup>3</sup> | ACMM Mn,<br>PM10, ng/m <sup>3</sup> |
|------------------------------------|-------------------------------------|
| 156.0 (112.0)                      | 87.4 (65.3)                         |

**Table S7.** Mean (Std. Dev.) PM<sub>10</sub> and Mn concentrations at Site A for 73 hours of coincidental ACMM and BAM data.

|         | Site A<br>PM <sub>10</sub><br>(µg/m <sup>3</sup> ) | Site A<br>Mn<br>(ng/m <sup>3</sup> ) | Traffic<br>Count<br>(vehicles<br>per hour) |
|---------|----------------------------------------------------|--------------------------------------|--------------------------------------------|
| Average | 175 (145)                                          | 182 (154)                            | 6.65 (5.22)                                |

**Table S8.** ACMM HAP Metals Correlations<sup>1</sup> with BAM PM<sub>10</sub> results (n = 177).

|            | Cr     | Mn     | Ni     | As     | Se     |
|------------|--------|--------|--------|--------|--------|
| Spearman r | 0.852  | 0.855  | 0.835  | 0.506  | -0.053 |
| p value    | <0.001 | <0.001 | <0.001 | <0.001 | 0.481  |

<sup>1</sup>HAP metals with over 48% non-detects were not included in the correlation calculations.

**Table S9.** Summary of HAP metals measured with the ACMM at Site A (n = 710).

| HAP metal | ACMM Median <sup>1</sup><br>Concentration, ng/m <sup>3</sup> | ACMM Detection Limit (60<br>min), ng/m <sup>3</sup> [5] |
|-----------|--------------------------------------------------------------|---------------------------------------------------------|
| Cr        | 1.04                                                         | 0.12                                                    |
| Mn        | 15.1                                                         | 0.14                                                    |
| Co        | 0                                                            | 0.14                                                    |
| Ni        | 0.09                                                         | 0.10                                                    |
| As        | 1.22                                                         | 0.063                                                   |
| Se        | 0.15                                                         | 0.081                                                   |
| Cd        | 0                                                            | 2.5                                                     |
| Sb        | 0                                                            | 5.2                                                     |
| Hg        | 0                                                            | 0.12                                                    |
| Pb        | 0                                                            | 0.13                                                    |
| Be        | Not analyzed <sup>2</sup>                                    |                                                         |

<sup>1</sup> The ACMM metal concentration distributions are neither normal nor lognormal.

<sup>2</sup> The ACMM cannot measure some of the lighter elements, including Be.

**Table S10.** Mean proportions (Std. Dev.) of coarse PM manganese mass to coarse PM total mass at Sites A and B and ratio of the Site A mean Mn proportion relative to the Site B Mn mean proportion (n = 8).

| Site A<br>Mn mass/PM mass<br>( $\mu\text{g}/\text{mg}$ ) | Site B<br>Mn mass/PM mass<br>( $\mu\text{g}/\text{mg}$ ) | Ratio |
|----------------------------------------------------------|----------------------------------------------------------|-------|
| 1.24 (0.34)                                              | 1.44 (0.34)                                              | 0.85  |

**Table S11.** Pairwise Spearman Correlations of Metals Results (Bulk Road Samples and Airborne PM Samples)

| Sample 1         | Sample 2          | n  | Correlation | p-Value |
|------------------|-------------------|----|-------------|---------|
| log ACMM (air)   | log ICP-MS (road) | 13 | 0.75        | 0.007   |
| log ICP-MS (air) | log ICP-MS (road) | 13 | 0.92        | <0.001  |
| log ICP-MS (air) | log ACMM (air)    | 13 | 0.87        | <0.001  |



## Figures

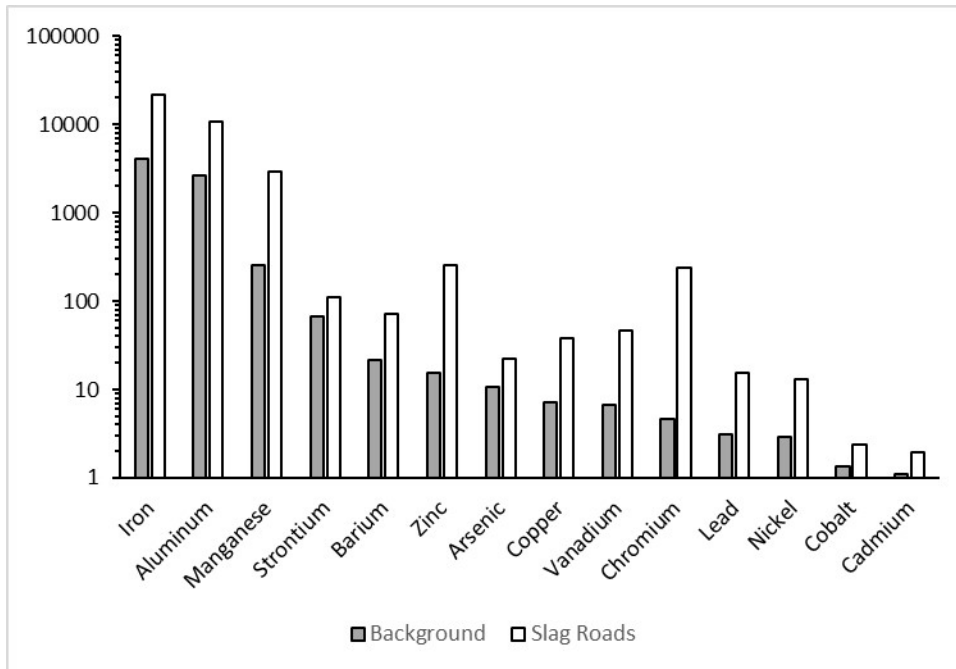

**Figure S1.** Average metals concentrations for 2 background sites relative to 8 sites near slag road.

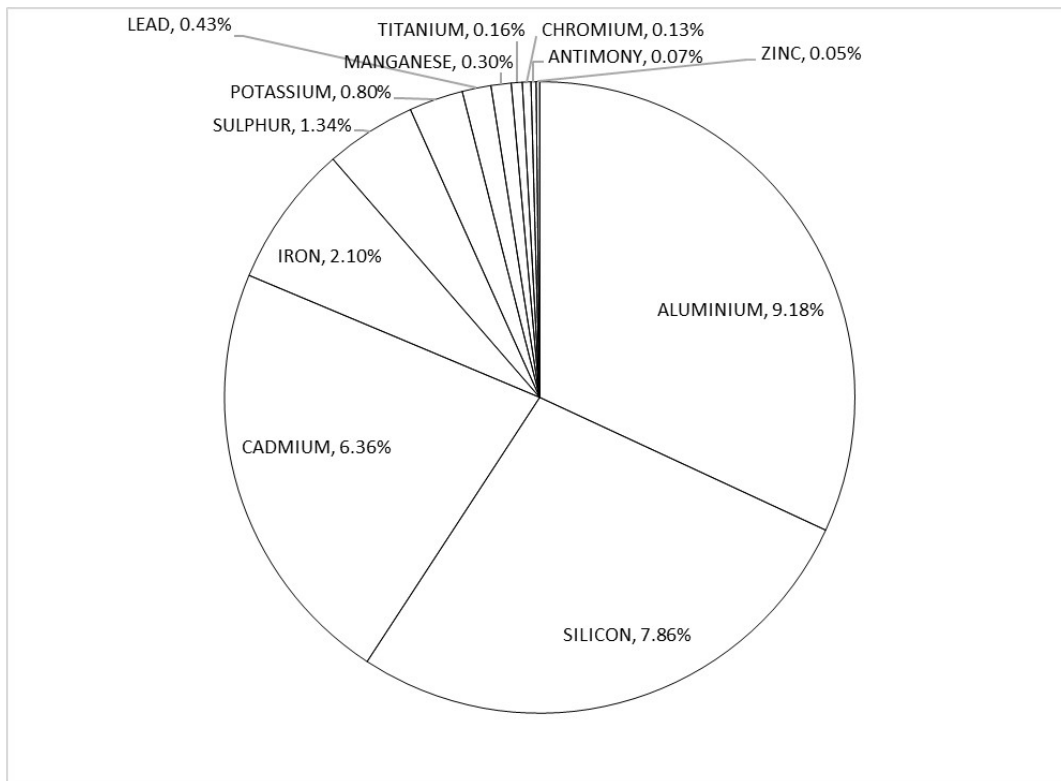

**Figure S2.** Distribution of average metal concentrations from the ACMM analyses in the PM<sub>10</sub> fraction of the PM from Site A (n = 709). Calcium, contributing 67% of the total, was excluded from this figure.

## References

1. EPA, *Method 3051A, Microwave Assisted Acid Digestion of Sediments, Sludges, Soils, and Oils*, U.S.E.P. Agency, Editor. 2007.
2. DOT, I. *Traffic Flow Map of Muscatine County, Iowa*. 2018 [cited 2021 August 15, 2021]; Available from: <https://iowadot.gov/maps/msp/traffic/2018/counties/MUSCATINE.pdf>.
3. DOT, I. *Traffic Flow Map of Scott County, Iowa*. 2018 [cited 2021 August 15, 2021]; Available from: <https://iowadot.gov/maps/msp/traffic/2018/counties/SCOTT.pdf>.
4. White, K., *Personal Communication*, J. Kacer, Editor. March 3, 2022.
5. Cooper Environmental, *Xact® 625i Multi-Metals Monitoring System Specification Sheet*. 2016, Cooper Environmental.
